# Supplementary material for: Effect of Heteroatom Doping on Electrochemical Properties of Olivine LiFePO4 Cathodes for High-Performance Lithium-Ion Batteries
Source: MDPI journal article supplement (doi:10.3390/ma17061299), 2024-03-11
Supplement: s1 [file s1]

## **Supplementary Information for**

# **Effect of Heteroatom Doping on Electrochemical Properties of Olivine $\text{LiFePO}_4$ Cathodes for High-Performance Lithium-Ion Batteries**

*Xiukun Jiang, Yan Xin<sup>\*</sup>, Bijiao He, Fang Zhang, Huajun Tian<sup>\*</sup>*

Key Laboratory of Power Station Energy Transfer Conversion and System of Ministry of Education and School of Energy Power and Mechanical Engineering, North China Electric Power University, Beijing, 102206, China  
E-mail: xinyan@ncepu.edu.cn, huajun.tian@ncepu.edu.cn

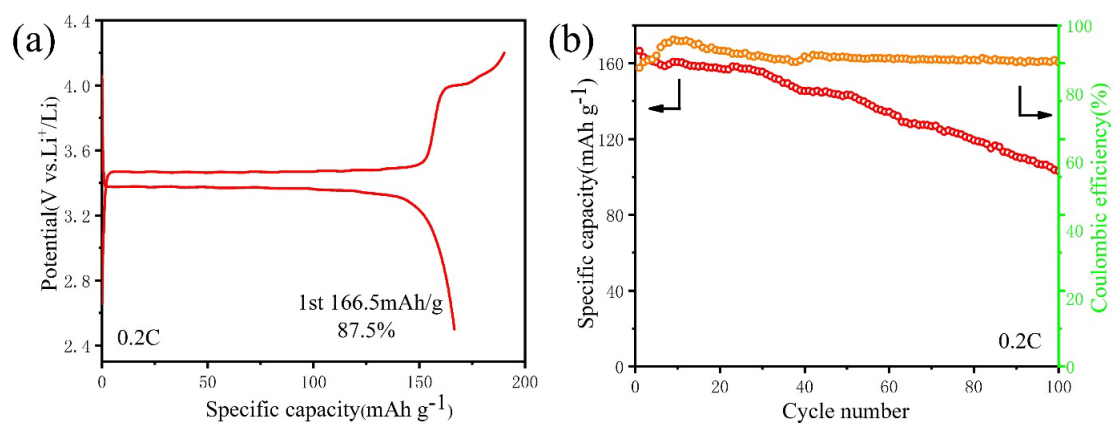

**Figure S1.** (a) Charge/discharge curves of LFP cathode materials prepared by sol-gel method at first cycle and (b) the related cycling performance of as-prepared LFP cathode at 0.2C.

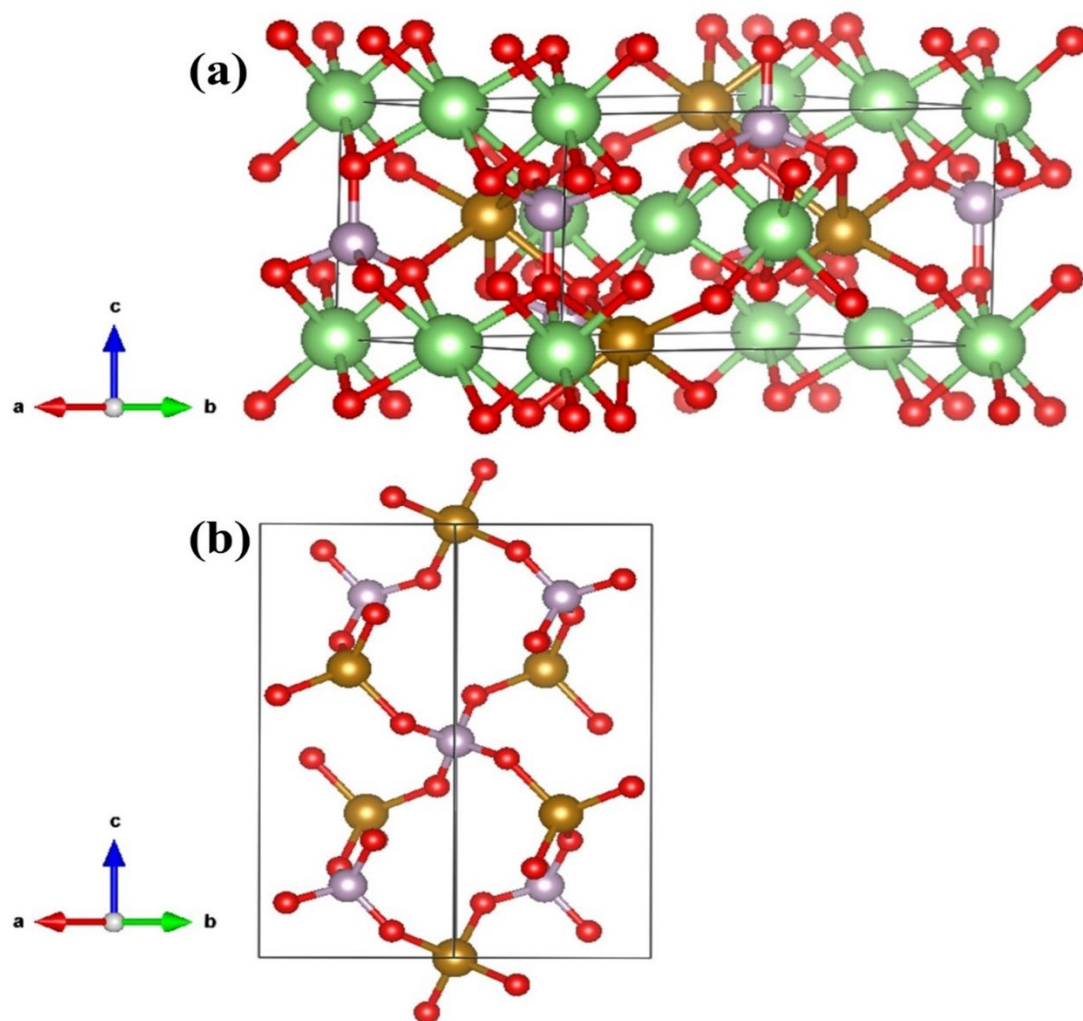

**Figure S2.** The optimized structures of (a)  $\text{LiFePO}_4$  and (b)  $\text{FePO}_4$ .

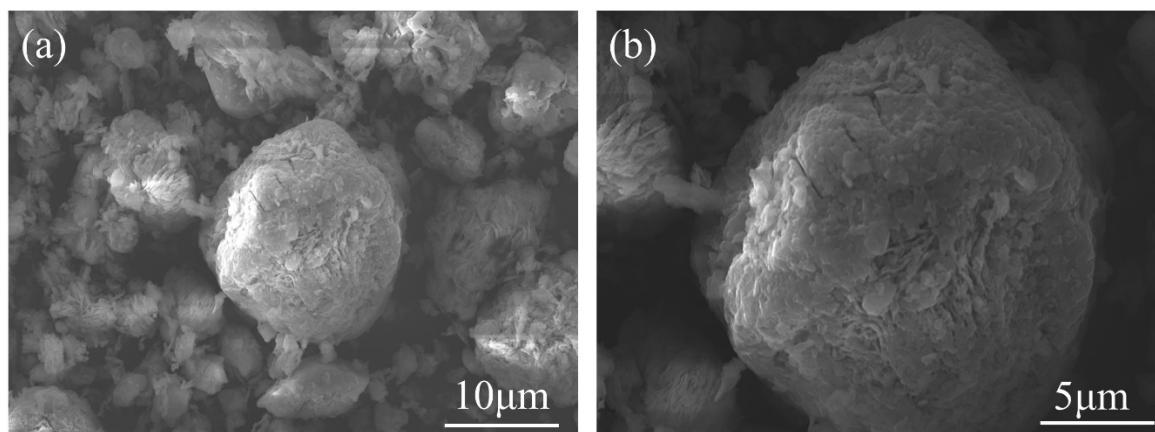

**Figure S3.** SEM images of the FePO<sub>4</sub> precursor particles (a) and the corresponding magnified images (b).

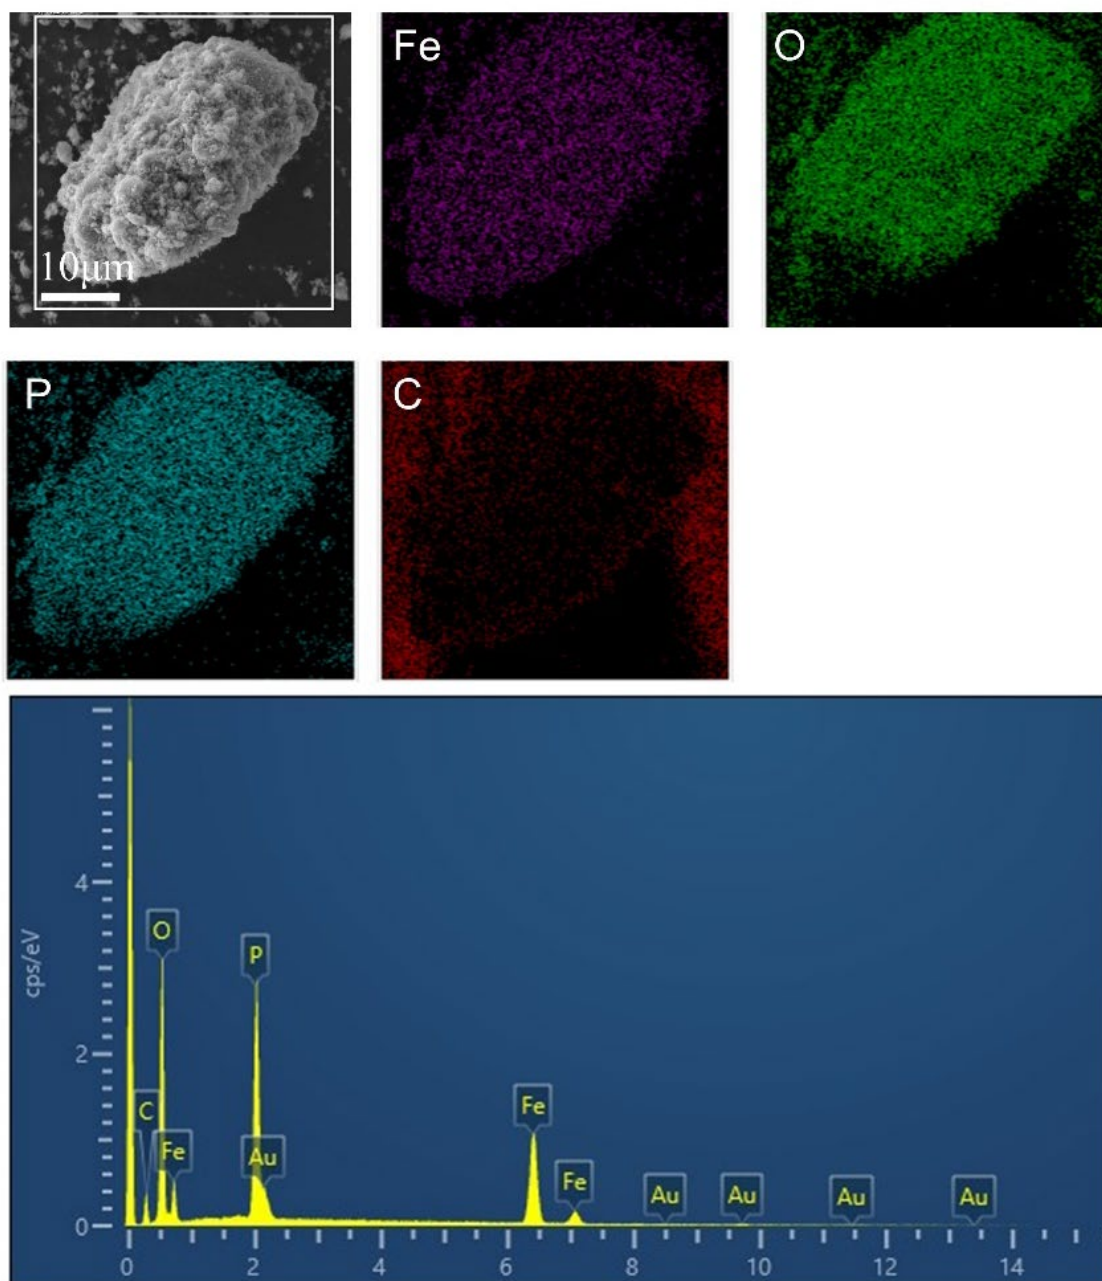

**Figure S4.** The SEM image and the corresponding elemental mapping images for the selected area of LFP/C particle.

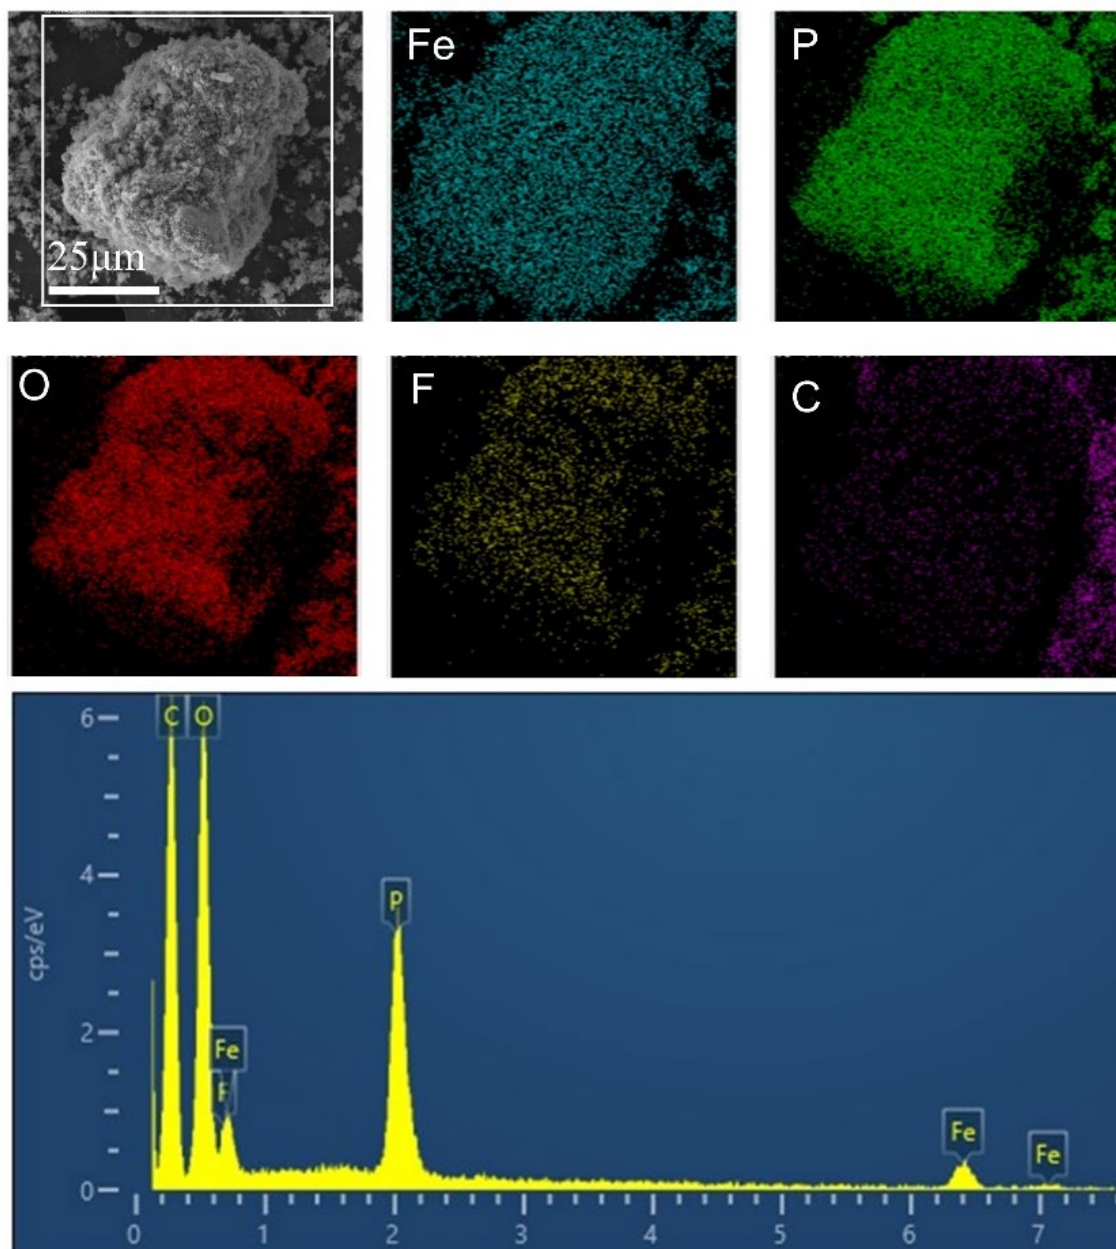

**Figure S5.** The SEM image and the corresponding elemental mapping images for the selected area of LFP/C-F<sub>3</sub> particle.



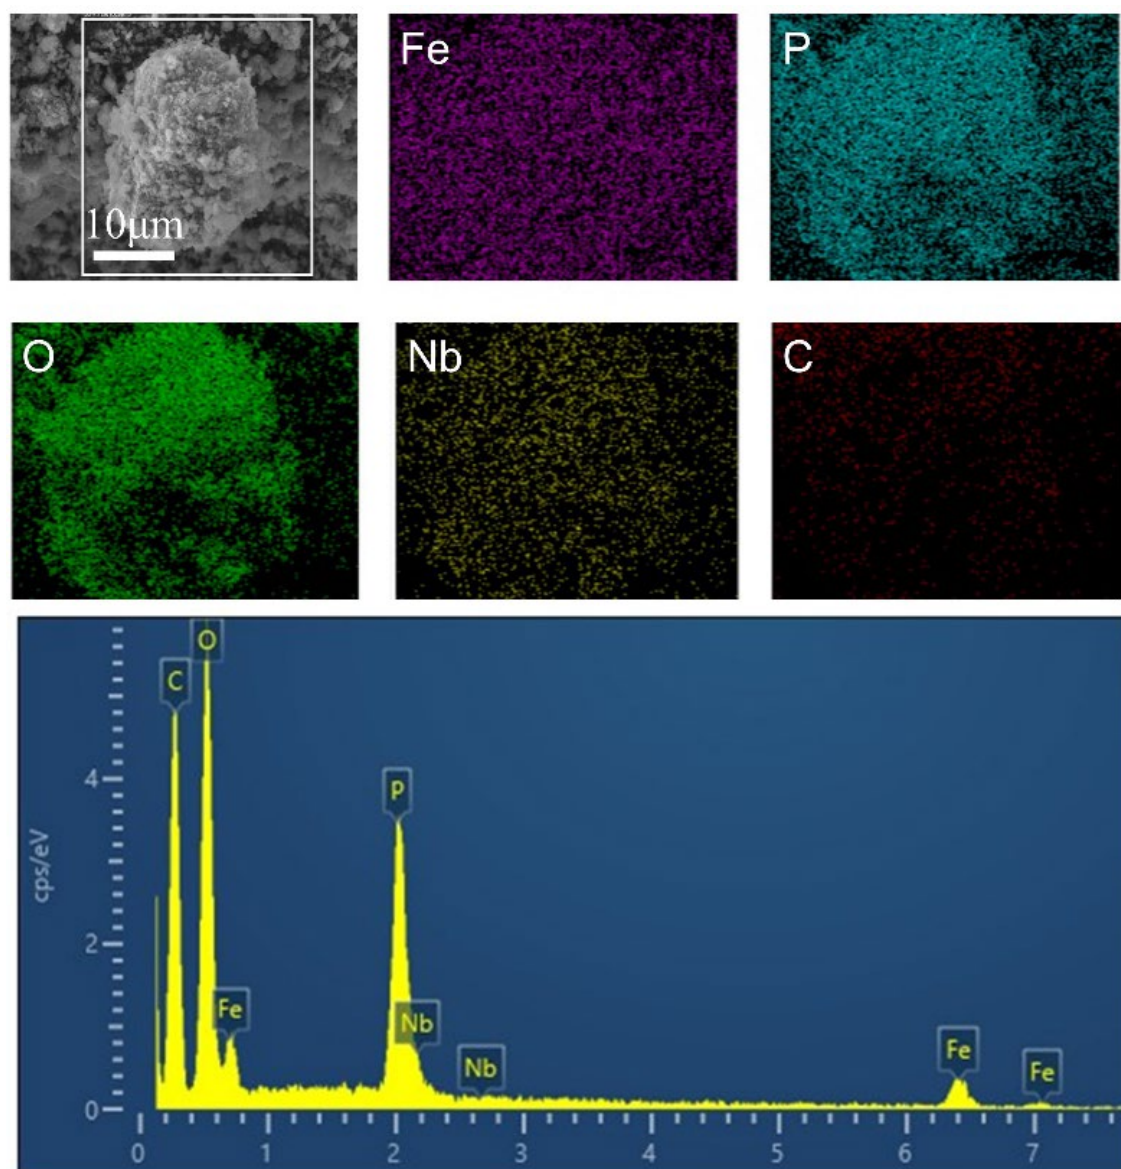

**Figure S6.** The SEM image and the corresponding elemental mapping images for the selected area of LFP/C-Nb<sub>1</sub> particle.

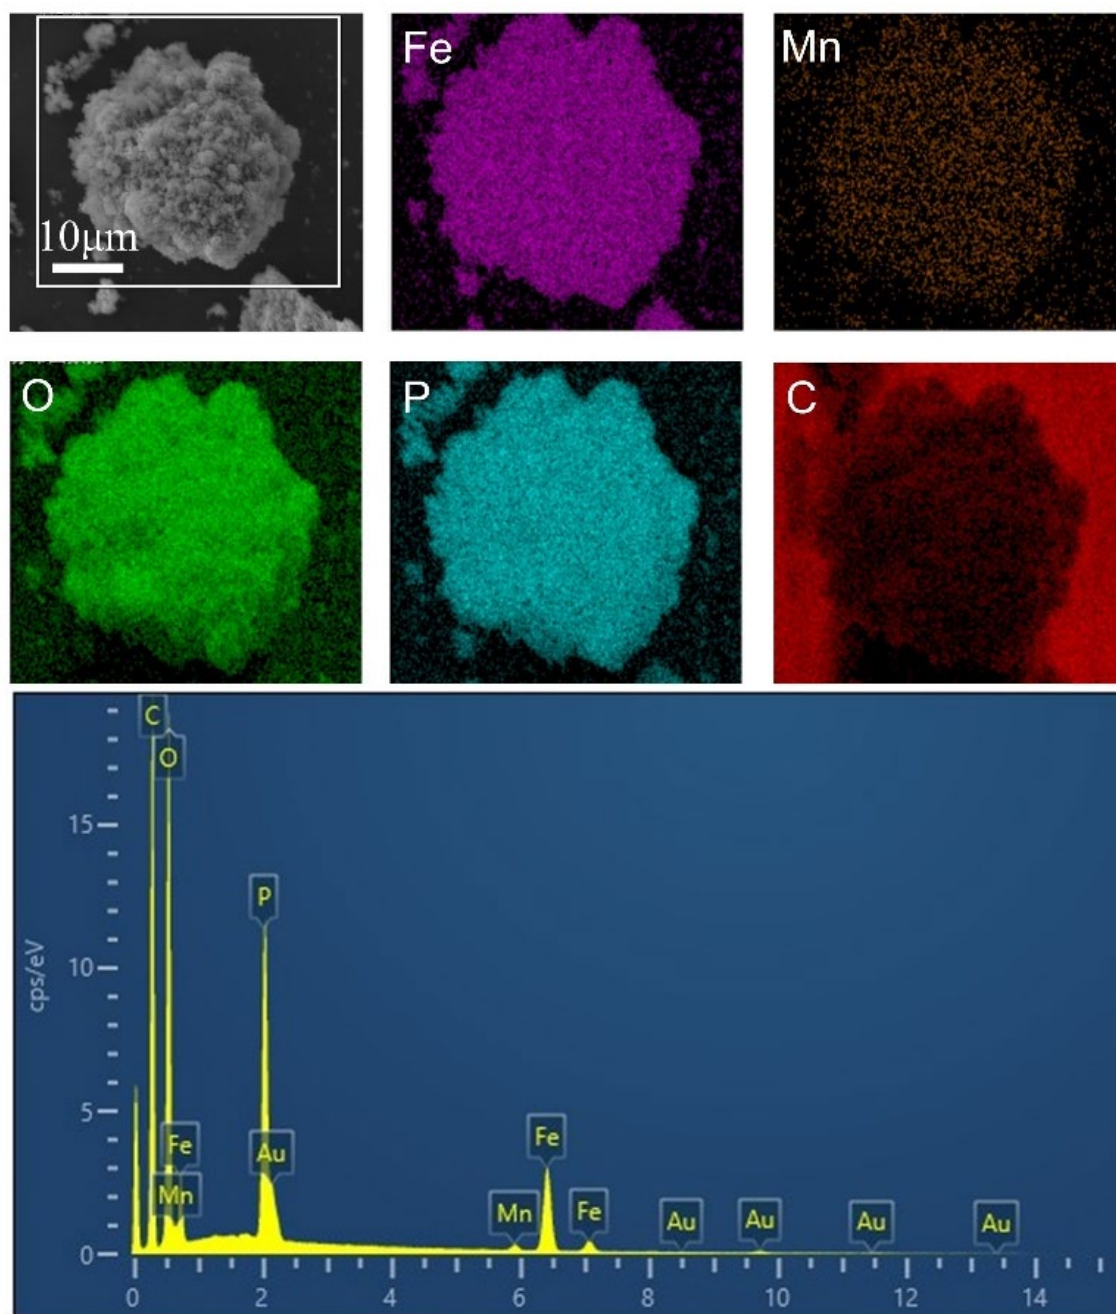

**Figure S7.** The SEM image and the corresponding elemental mapping images for the selected area of LFP/C-Mn<sub>3</sub> particle.

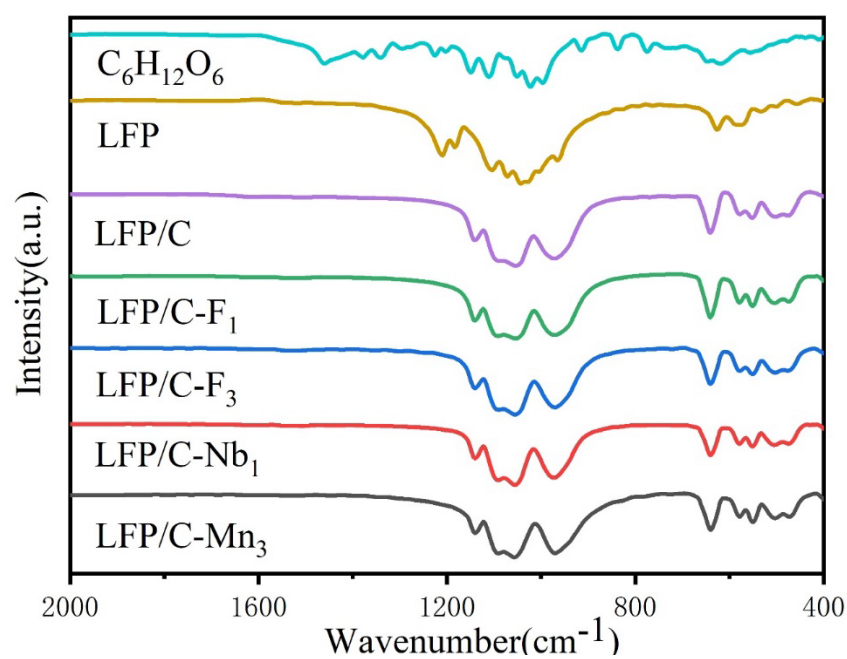

**Figure S8.** FT-IR spectra of  $\text{C}_6\text{H}_{12}\text{O}_6$ , LFP, LFP/C and LFP/C- $\text{X}_n$  cathode materials.

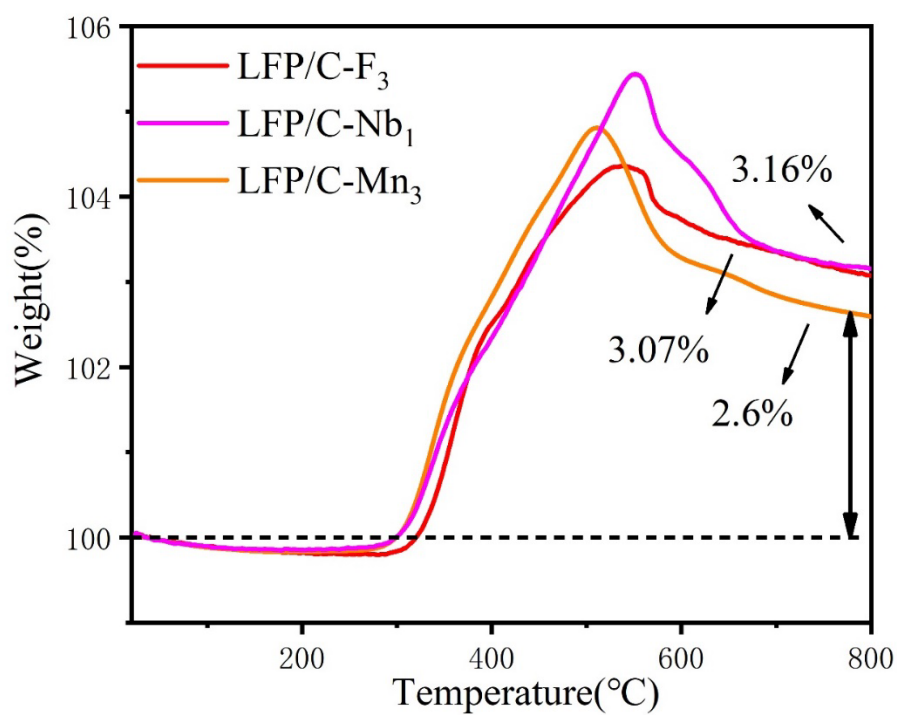

**Figure S9.** TGA curves of LFP/C- $\text{Nb}_1$ , LFP/C- $\text{F}_3$ , LFP/C- $\text{Mn}_3$ .



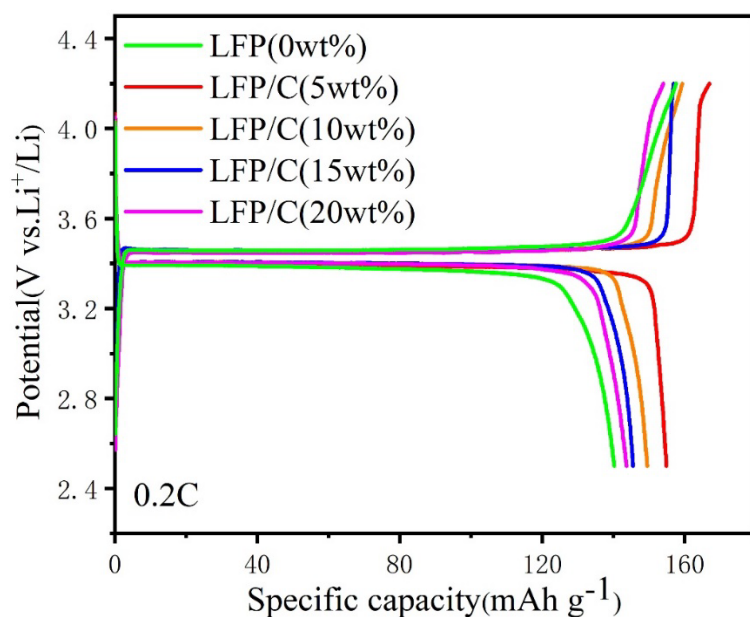

**Figure S10.** Charge–discharge curves of LFP/C samples with different glucose contents.

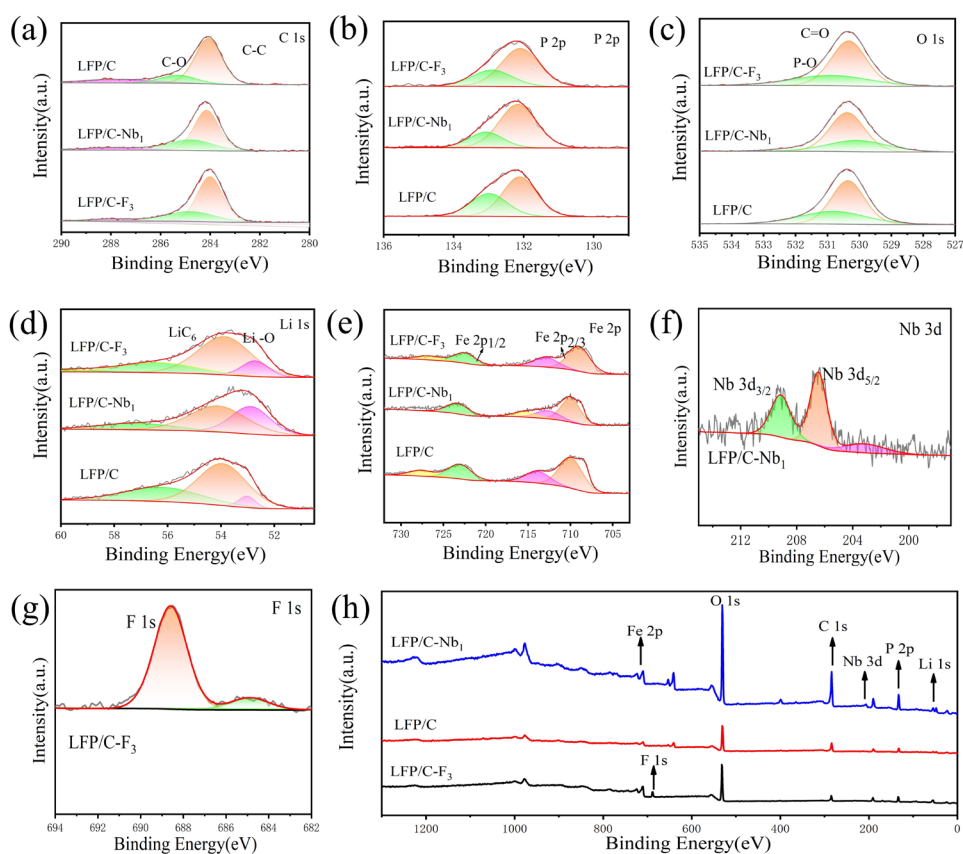

**Figure S11.** XPS spectra and the fitting results of LFP/C-F<sub>3</sub>, LFP/C-Nb<sub>1</sub> and LFP/C for cathode materials. (a) C 1s spectra, (b) P 2p spectra, (c) O 1s spectra, (d) Li 1s spectra, (e) Fe 2p spectra, (f) Nb 3d spectra, (g) F 1s spectra and (h) the full spectrum of the as-prepared samples.

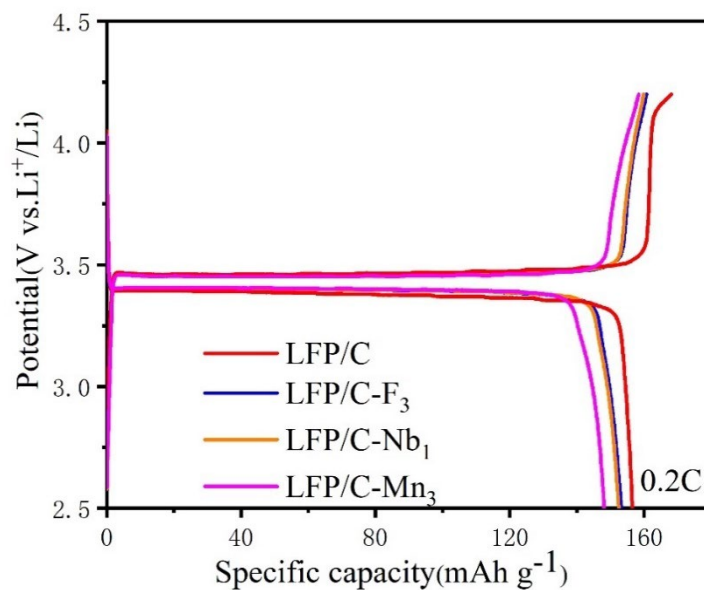

**Figure S12.** The first-cycle charge-discharge curves of LFP/C and LFP/C- $X_n$  cathodes.

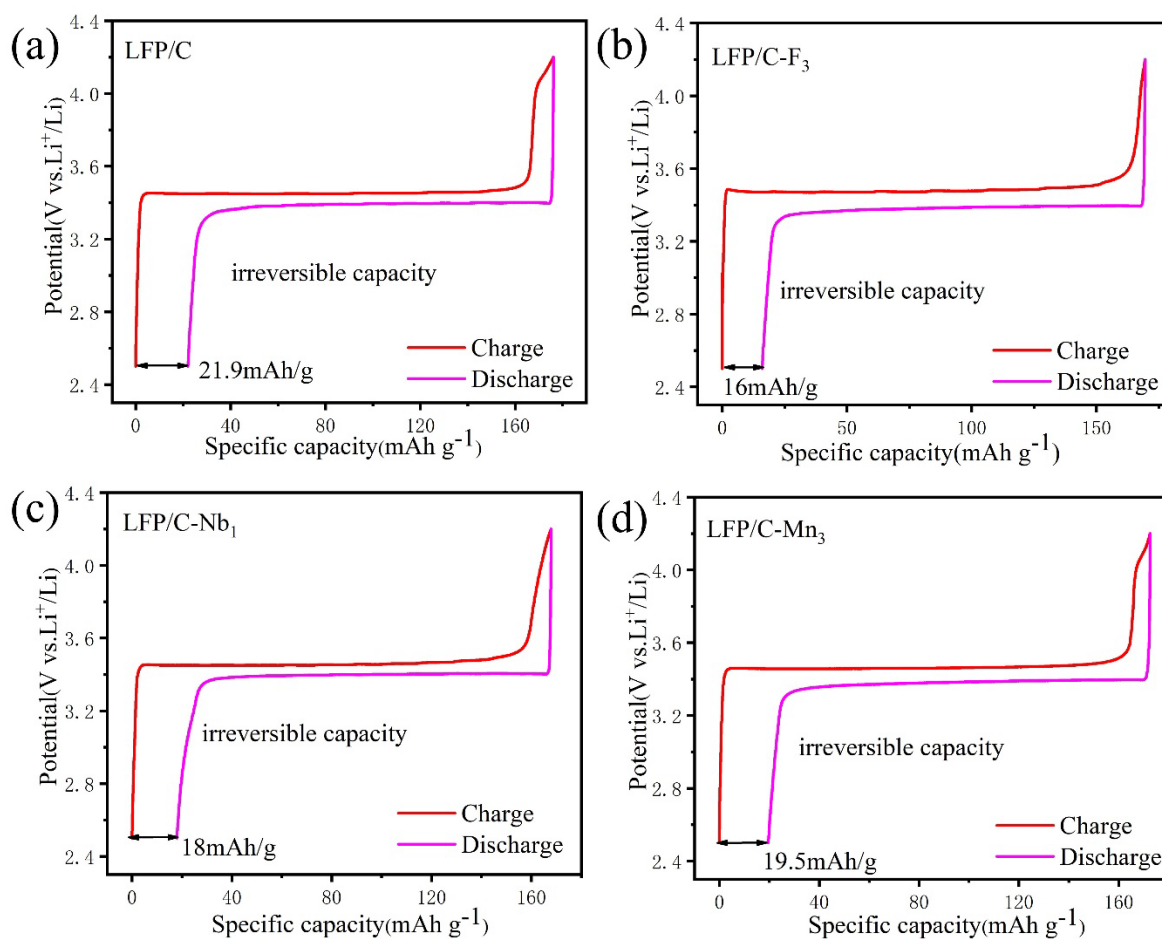

**Figure S13.** The first charge-discharge curves of the (a) LFP/C, (b) LFP/C- $F_3$ , (c) LFP/C- $Nb_1$ , and (d) LFP/C- $Mn_3$  cathodes at 0.2 C.

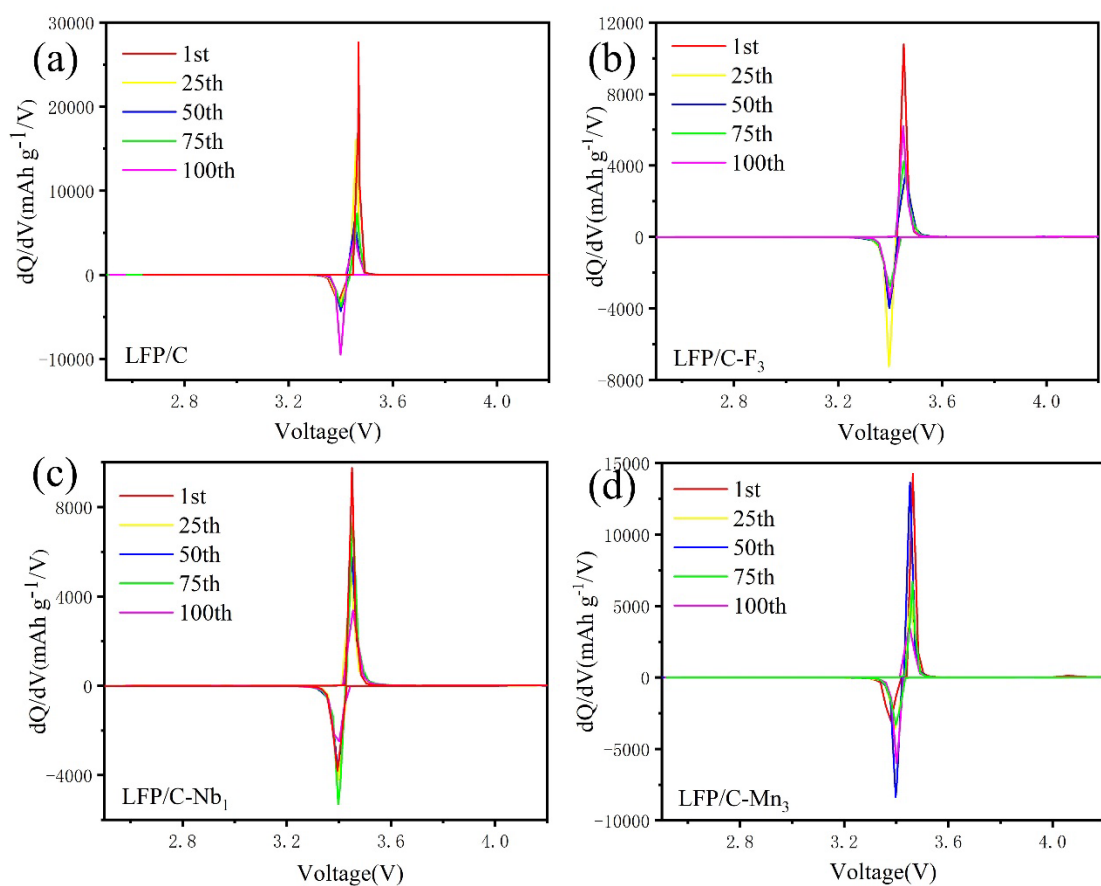

**Figure S14.** The selected  $dQ/dV$  curves of (a) LFP/C, (b) LFP/C- $\text{F}_3$ , (c) LFP/C- $\text{Nb}_1$  and (d) LFP/C- $\text{Mn}_3$  at 0.2C in different cycles.

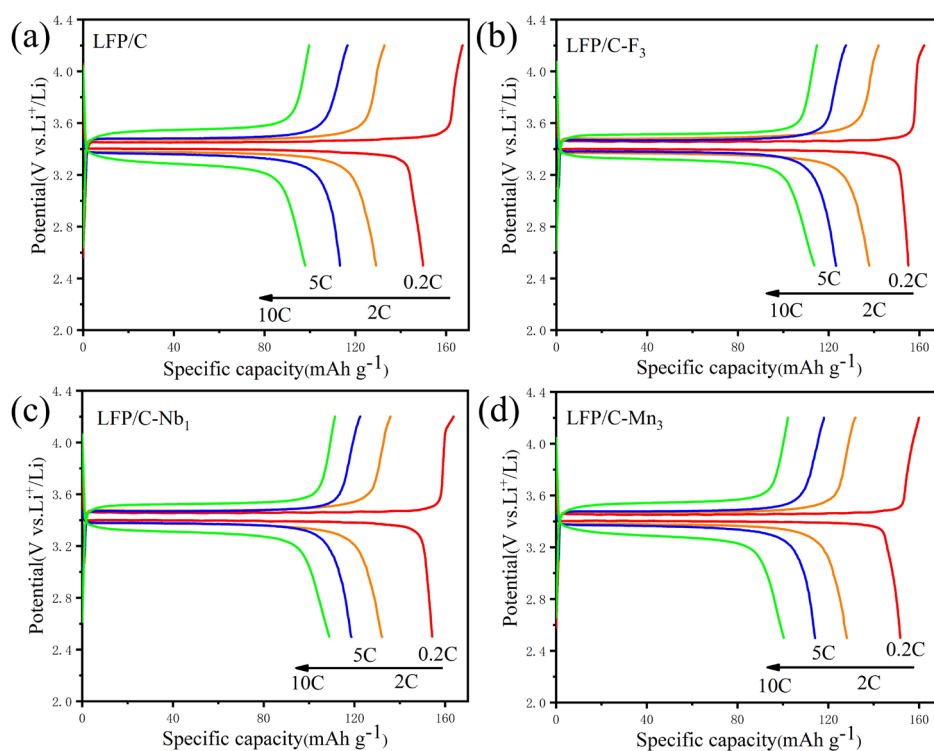

**Figure S15.** Charge-discharge curves of (a) LFP/C, (b) LFP/C- $\text{F}_3$ , (c) LFP/C- $\text{Nb}_1$  and (d) LFP/C- $\text{Mn}_3$  under different charge/discharge rates.

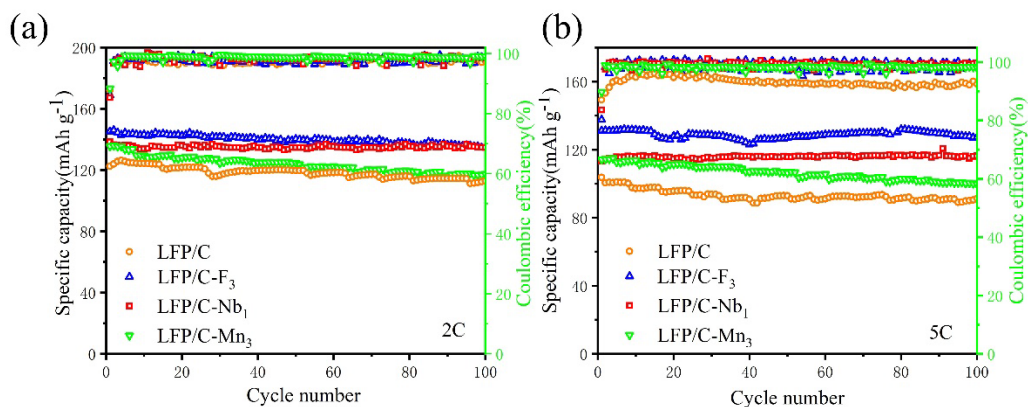

**Figure S16.** Cycling performance of LFP/C, LFP/C- $\text{F}_3$ , LFP/C- $\text{Nb}_1$ , and LFP/C- $\text{Mn}_3$  samples at (a) 2 C and (b) 5C in the range of 2.5–4.2 V at 25 °C.

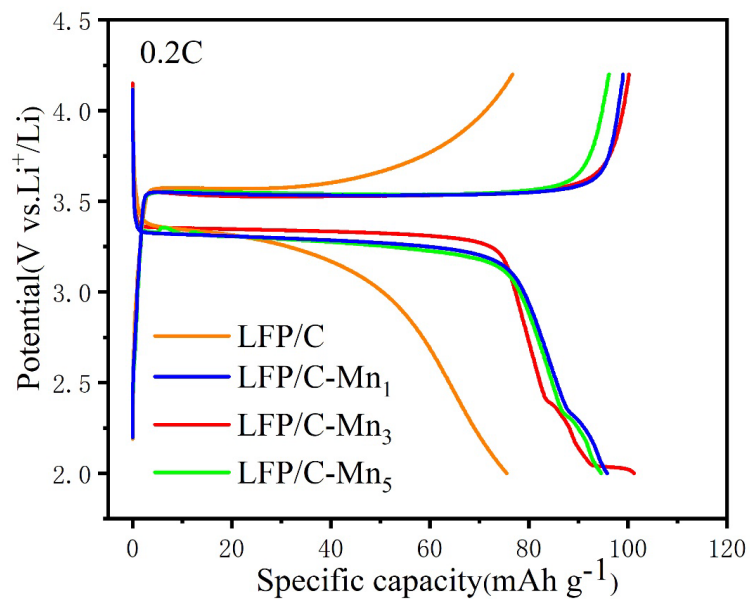

**Figure S17.** The charge-discharge curves of Mn-doped LFP/C cathodes at 0.2 C at low temperature  $-15\text{ }^{\circ}\text{C}$ .

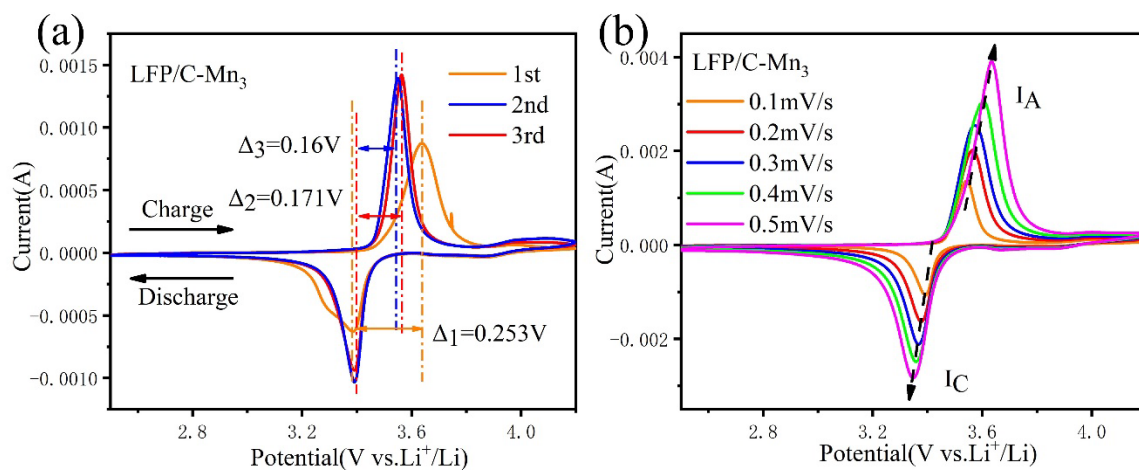

**Figure S18.** CV curves of (a) LFP/C-Mn<sub>3</sub> at a scan rate of  $0.1\text{ mV s}^{-1}$  and (b) LFP/C-Mn<sub>3</sub> at various scan rates.

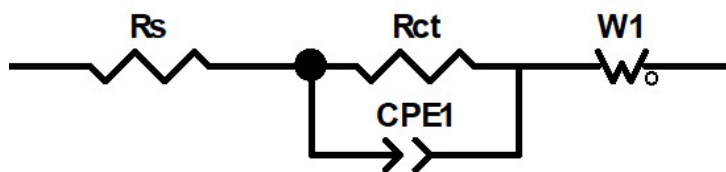

**Figure S19.** Equivalent circuit diagram fitted and used in EIS data.



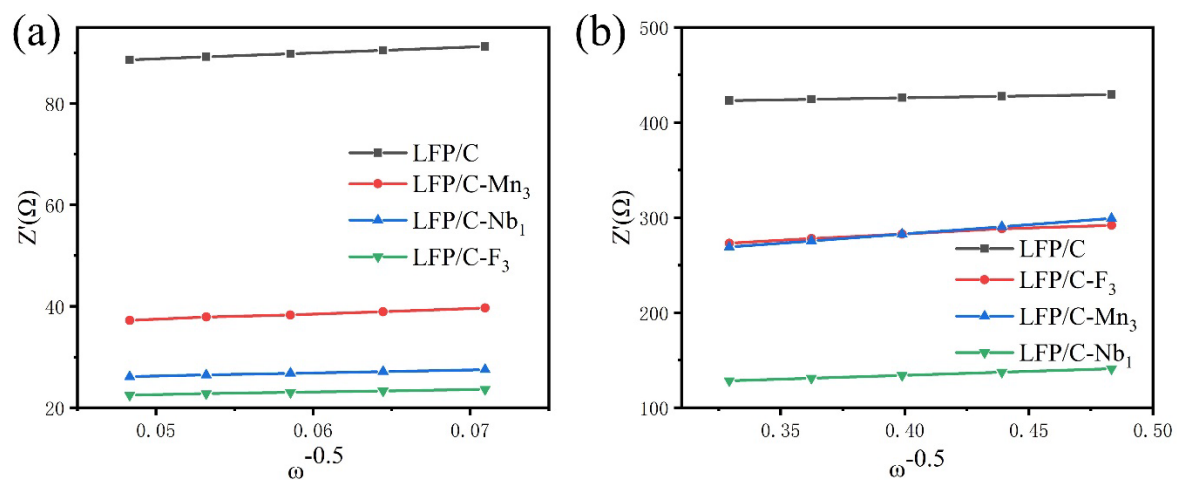

**Figure S20.** The relationship between low-frequency  $Z'$  and  $\omega^{-0.5}$  values derived from EIS results of LFP/C, LFP/C-F<sub>3</sub>, LFP/C-Nb<sub>1</sub> and LFP/C-Mn<sub>3</sub> samples after (a) 3 cycles and (b) 100 cycles.

**Table S1.** Structural parameters obtained from Rietveld refinements of XRD patterns of the LFP/C and dopant-modified cathode materials [1,2].

| Samples   | Lattice Parameter (Å) |          |          | Volume (Å <sup>3</sup> ) | Rwp%  | Rp%  |
|-----------|-----------------------|----------|----------|--------------------------|-------|------|
|           | <i>a</i>              | <i>b</i> | <i>c</i> |                          |       |      |
| LFP/C     | 10.3244               | 6.0064   | 4.6901   | 290.845                  | 1.564 | 1.28 |
| LFP/C-F3  | 10.3190               | 6.0027   | 4.6894   | 290.470                  | 1.508 | 1.23 |
| LFP/C-Nb1 | 10.3141               | 6.0005   | 4.6891   | 290.207                  | 1.367 | 1.12 |
| LFP/C-Mn3 | 10.3210               | 6.0048   | 4.6897   | 290.647                  | 1.502 | 1.21 |

**Table S2.** Rietveld refinement results of the LFP cathode materials modified by doping.

| Sample                | Atom | Position | x       | y       | z       |
|-----------------------|------|----------|---------|---------|---------|
| LFP/C                 | Fe   | 4c       | 0.28246 | 0.25    | 0.9703  |
|                       | P    | 4c       | 0.0946  | 0.25    | 0.4247  |
|                       | O    | 4c       | 0.0937  | 0.25    | 0.7489  |
|                       | O    | 4c       | 0.4518  | 0.25    | 0.2134  |
|                       | O    | 8d       | 0.1605  | 0.0544  | 0.2796  |
|                       | Li   | 4a       | 0       | 0       | 0       |
| LFP/C-F <sub>3</sub>  | Fe   | 4c       | 0.28234 | 0.25    | 0.9709  |
|                       | P    | 4c       | 0.0939  | 0.25    | 0.4247  |
|                       | O    | 4c       | 0.094   | 0.25    | 0.7472  |
|                       | O    | 4c       | 0.4526  | 0.25    | 0.2074  |
|                       | O    | 8d       | 0.1621  | 0.057   | 0.2804  |
|                       | Li   | 4a       | 0       | 0       | 0       |
|                       | F    | 4c       | 0.094   | 0.25    | 0.7472  |
| LFP/C-Nb <sub>1</sub> | Fe   | 4c       | 0.28218 | 0.25    | 0.9708  |
|                       | P    | 4c       | 0.094   | 0.25    | 0.4268  |
|                       | O    | 4c       | 0.0911  | 0.25    | 0.7513  |
|                       | O    | 4c       | 0.4509  | 0.25    | 0.2152  |
|                       | O    | 8d       | 0.1615  | 0.0593  | 0.2784  |
|                       | Li   | 4a       | 0       | 0       | 0       |
|                       | Nb   | 4a       | 0       | 0       | 0       |
| LFP/C-Mn <sub>3</sub> | Fe   | 4c       | 0.28221 | 0.25    | 0.97472 |
|                       | P    | 4c       | 0.09486 | 0.25    | 0.41827 |
|                       | O    | 4c       | 0.09697 | 0.25    | 0.7426  |
|                       | O    | 4c       | 0.4572  | 0.25    | 0.20584 |
|                       | O    | 8d       | 0.16557 | 0.04656 | 0.28492 |
|                       | Li   | 4a       | 0       | 0       | 0       |
|                       | Mn   | 4c       | 0.28221 | 0.25    | 0.97472 |

**Table S3.** Slope values of fitted  $ip-v^{1/2}$  curves and diffusion coefficients of charged ( $D_{OI}$ ) and discharged ( $D_{RI}$ ) lithium ions of LFP/C, LFP/C-F<sub>3</sub>, LFP/C-Nb<sub>1</sub>, and LFP/C-Mn<sub>3</sub> cathodes for CV tests at different scan rates.

| Sample                | I <sub>A</sub> slope | I <sub>c</sub> slope | $D_{OI}$ (cm <sup>2</sup> s <sup>-1</sup> ) | $D_{RI}$ (cm <sup>2</sup> s <sup>-1</sup> ) |
|-----------------------|----------------------|----------------------|---------------------------------------------|---------------------------------------------|
| LFP/C                 | 0.00527              | -0.00381             | $4.54 \times 10^{-12}$                      | $3.24 \times 10^{-12}$                      |
| LFP/C-F <sub>3</sub>  | 0.00683              | -0.00539             | $1.49 \times 10^{-11}$                      | $1.15 \times 10^{-11}$                      |
| LFP/C-Nb <sub>1</sub> | 0.00558              | -0.00456             | $8.53 \times 10^{-12}$                      | $7.28 \times 10^{-12}$                      |
| LFP/C-Mn <sub>3</sub> | 0.00543              | -0.00401             | $5.16 \times 10^{-12}$                      | $4.05 \times 10^{-12}$                      |

**Table S4.** Ohmic resistance ( $R_s$ ) and charge transfer resistance ( $R_{ct}$ ) values and calculated Li<sup>+</sup> diffusion coefficients ( $D_{Li+}$ ) for LFP/C, LFP/C-F<sub>3</sub>, LFP/C-Nb<sub>1</sub>, and LFP/C-Mn<sub>3</sub> cathodes after different cycles.

| Samples               | Cycle | $R_s(\Omega)$ | $R_{ct}(\Omega)$ | $D_{Li+}(\text{cm}^2 \text{ s}^{-1})$ |
|-----------------------|-------|---------------|------------------|---------------------------------------|
| LFP/C                 | 3rd   | 2.681         | 76.52            | $2.36 \times 10^{-13}$                |
|                       | 100th | 5.502         | 378.50           | $5.58 \times 10^{-14}$                |
| LFP/C-F <sub>3</sub>  | 3rd   | 1.760         | 20.63            | $8.72 \times 10^{-13}$                |
|                       | 100th | 3.381         | 199.70           | $2.15 \times 10^{-13}$                |
| LFP/C-Nb <sub>1</sub> | 3rd   | 2.509         | 20.88            | $7.14 \times 10^{-13}$                |
|                       | 100th | 3.326         | 110.10           | $4.59 \times 10^{-13}$                |
| LFP/C-Mn <sub>3</sub> | 3rd   | 2.844         | 38.45            | $4.06 \times 10^{-13}$                |
|                       | 100th | 4.231         | 206.14           | $1.37 \times 10^{-13}$                |

**Table S5.** Specific capacity of multiple LFP/C and doped LFP/C samples at different rates.

| Samples                  | 0.2C(mAh g <sup>-1</sup> ) | 2C (mAh g <sup>-1</sup> ) | 5C (mAh g <sup>-1</sup> ) | 10C (mAh g <sup>-1</sup> ) |
|--------------------------|----------------------------|---------------------------|---------------------------|----------------------------|
| LFP/C-1                  | 149.9                      | 129.2                     | 113.3                     | 97.9                       |
| LFP/C-2                  | 150.6                      | 129.7                     | 111.8                     | 98.1                       |
| LFP/C-3                  | 149.4                      | 127.3                     | 111.5                     | 96.3                       |
| LFP/C-F <sub>3</sub> -1  | 155.1                      | 137.9                     | 123.3                     | 113.7                      |
| LFP/C-F <sub>3</sub> -2  | 156.3                      | 136.5                     | 122.7                     | 114.2                      |
| LFP/C-F <sub>3</sub> -3  | 154.4                      | 136.1                     | 121.3                     | 112.8                      |
| LFP/C-Nb <sub>1</sub> -1 | 154.3                      | 132.2                     | 118.7                     | 108.9                      |
| LFP/C-Nb <sub>1</sub> -2 | 155.2                      | 133.0                     | 117.2                     | 109.2                      |
| LFP/C-Nb <sub>1</sub> -3 | 154.9                      | 131.7                     | 115.5                     | 108.5                      |
| LFP/C-Mn <sub>3</sub> -1 | 151.7                      | 128.2                     | 114.2                     | 100.4                      |
| LFP/C-Mn <sub>3</sub> -2 | 150.5                      | 129.3                     | 114.7                     | 102.2                      |
| LFP/C-Mn <sub>3</sub> -3 | 150.2                      | 129.1                     | 113.6                     | 101.8                      |

**Table S6.** Standard deviation of LFP/C and doped samples at different rates.

| Samples               | 0.2C     | 2C       | 5C       | 10C      |
|-----------------------|----------|----------|----------|----------|
| LFP/C                 | 0.602771 | 1.266228 | 0.964365 | 0.986577 |
| LFP/C-F <sub>3</sub>  | 0.960902 | 0.945163 | 1.026320 | 0.709460 |
| LFP/C-Nb <sub>1</sub> | 0.458258 | 0.655744 | 1.601041 | 0.351188 |
| LFP/C-Mn <sub>3</sub> | 0.793725 | 0.585947 | 0.550757 | 0.945163 |

## References

1. Jiang, F.; Qu, K.; Wang, M.; Chen, J.; Liu, Y.; Xu, H.; Huang, Y.; Li, J.; Gao, P.; Zheng, J.; Chen, M.; Li, X., Atomic scale insight into the fundamental mechanism of Mn doped LiFePO<sub>4</sub>. *Sustain. Energy Fuels* **2020**, *4*, 2741-2751.
2. Karimzadeh, S.; Safaei, B.; Huang, W.; Jen, T. C., Theoretical investigation on niobium doped LiFePO<sub>4</sub> cathode material for high performance lithium-ion batteries. *J. Energy Storage* **2023**, *67*, 107572.
